# Supplementary material
Source: PubMed Central journal article supplement (PMC10644241)
Supplement: jama-e2320196-s001.pdf [file jama-e2320196-s001.pdf]

## Data Sharing Statement

Tu. Inequitable Conduct and Invalidation of Patents Related to Food and Drug Administration–Regulated Products. *JAMA*. Published November 13, 2023. doi:10.1001/jama.2023.20196

### Data

**Data available:** Yes

**Data types:** Data (not involving human participants)

**How to access data:** [shine.tu@mail.wvu.edu](mailto:shine.tu@mail.wvu.edu)

**When available:** With publication

### Supporting Documents

**Document types:** None

### Additional Information

**Who can access the data:** Researchers whose proposed use of the data has been approved

**Types of analyses:** For research purposes

**Mechanisms of data availability:** With a signed data access agreement
